# Supplementary material for: Simultaneous electrochemical detection of both PSMA (+) and PSMA (−) prostate cancer cells using an RNA/peptide dual-aptamer probe
Source: Royal Society of Chemistry journal article supplement (doi:10.1039/c002524k), 2010-01-01
Supplement: c002524k.pdf [file c002524k.pdf]

Electronic Supplementary Information  
**Simultaneous electrochemical detection of both  
PSMA (+) and PSMA (-) prostate cancer cells  
using an RNA/peptide dual-aptamer probe**

Kyoungin Min,<sup>a</sup> Kyung-Mi Song,<sup>a</sup> Minseon Cho,<sup>a</sup> Yang-Sook Chun,<sup>c</sup>  
Yoon-Bo Shim,<sup>b</sup> Ja Kang Ku<sup>a</sup> and Changill Ban<sup>\*a</sup>

<sup>a</sup> Department of Chemistry, Pohang University of Science and Technology,  
San31, Hyoja-dong, Pohang, Gyungbuk, 790-784, South Korea. Fax: 82 54 279  
9929; Tel: 82 54 279 2127; E-mail: [ciban@postech.ac.kr](mailto:ciban@postech.ac.kr)

<sup>b</sup> Department of Chemistry, Pusan National University, Jangjeon-dong, Busan,  
609-735

<sup>c</sup> Department of Physiology, Seoul National University College of Medicine, 28  
Yeongeon-dong, Jongno-gu, Seoul 110-799

**Aptamer preparation:**

**Synthesis of an A10 RNA aptamer:** The anti-PSMA aptamer (A10, GGGAGGACCGAUGCGGAUCAGCCAUGUUUACGUCACUCCUUGUCAAUCCUCAUCGGC, underlined nucleotide represents the modified pyrimidins of 2'-F UTP and 2'-F CTP) was synthesized by *in vitro* transcription<sup>1</sup> with non-canonical ribose 2'-F-UTP and 2'-F-CTP using the Y639F RNA polymerase: in 100  $\mu$ L of 40 mM Tris-acetate buffer (pH 8.0) containing 10 mM magnesium acetate, 0.5 mM  $MnCl_2$ , 8 mM spermidine, 10 mM DTT, 1 mM EDTA, 50  $\mu$ g/mL DNA template, 5 mM of each NTP and 2  $\mu$ L of the purified Y639F RNAP (5 mg mL). The reaction was carried out at 37°C for 6 hr. After adding of 10  $\mu$ L of DNase I (1 mg/mL), the mixture was incubated at 37°C for 10 min to remove the DNA template. Transcribed RNA aptamer was extracted using phenol:chloroform (1:1) solution and the RNA aptamer was recovered by an ethanol precipitation method.

**Biotinylation of A10 aptamer:** The purified A10 aptamer was oxidized in the dark with 300  $\mu$ L of 0.1 M  $NaIO_4$  in a 0.1 M sodium acetate buffer (pH 5.0) for 90 min at 25 °C. The reaction was stopped by the addition of glycerol (300  $\mu$ L). The product was precipitated using ethanol, and finally, the oxidized RNA aptamer was coupled to 5 mM biotin hydrazide in 300  $\mu$ L of 0.1M sodium acetate buffer (pH 5.0) for 4 hr at 25°C. The biotin-modified RNA aptamer was purified by a gel electrophoresis method.<sup>2</sup> Biotinylated DUP-1 peptide aptamer (FRPNRAQDYNTN) was purchased from Anygen (Korea) and used without further purification.

**A cell labeling experiment:** The biotinylated A10 aptamer (0.5  $\mu\text{M}$ ) and DUP-1 aptamer (1.0  $\mu\text{M}$ ) were incubated with streptavidin coated  $\text{Q}_{655}$  materials (0.5  $\mu\text{M}$ ) for 1 hr. After the incubation process, biotin (1.5  $\mu\text{M}$ ) was added to each complex to block the free streptavidin on  $\text{Q}_{655}$ . Dual-aptamer modified  $\text{Q}_{655}$  particles were supplemented with 0.2 mg/mL BSA to each LNCaP, PC-3, HeLa, and PNT2 cell line for 1 hr. Only PBS treated cells were prepared for negative controls. This labeling experiment was performed at room temperature with gentle shaking. After incubation of the probe- $\text{Q}_{655}$  complex, each cell was washed with PBS buffer for three times. The probe-modified  $\text{Q}_{655}$  particles attaching to the cells were observed by optical microscope (Axiovert 40 CFL).

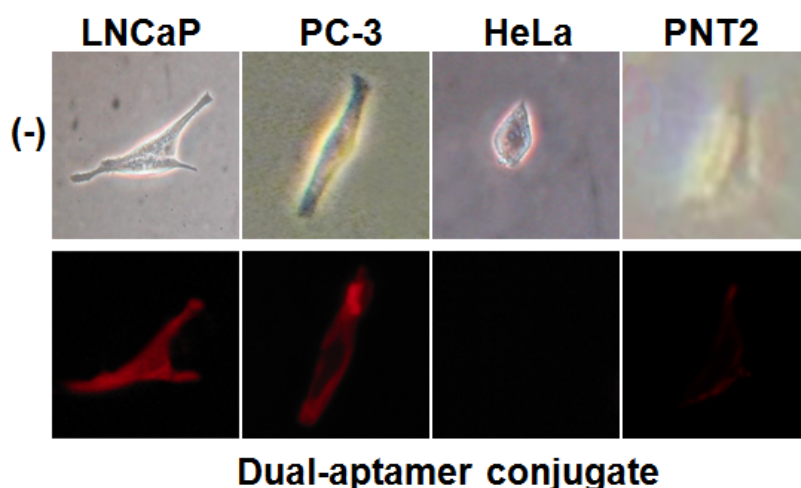

**Figure S1.** A cell labeling experiment for confirming specificity of the RNA/peptide dual-aptamer probe to prostate cancer cells.

**Impedance measurement for cell detection:** An electrochemical cell for EIS analysis was organized into a three-electrode configuration that consists of an Ag/AgCl reference electrode in saturated KCl solution, a platinum counter electrode, and the aptamer-immobilized Au working electrode. Faradaic impedance spectra were recorded using a PARSTAT 2263 (USA) at an open circuit potential of 10 kHz to 100 MHz. All electrochemical impedance measurements were performed in a PBS (pH 7.4) buffer with 5 mM  $[\text{Fe}(\text{CN})_6]^{3-/4-}$ , and impedance spectra were collected as a form of Nyquist plots. This dual-aptamer probe modified electrode was respectively immersed into various cell-suspension solutions (400  $\mu\text{L}$ ) for 30 min with gentle shaking (80 rpm) and checked for the specific binding of their target cell lines that was reflected in the  $R_{ct}$ .

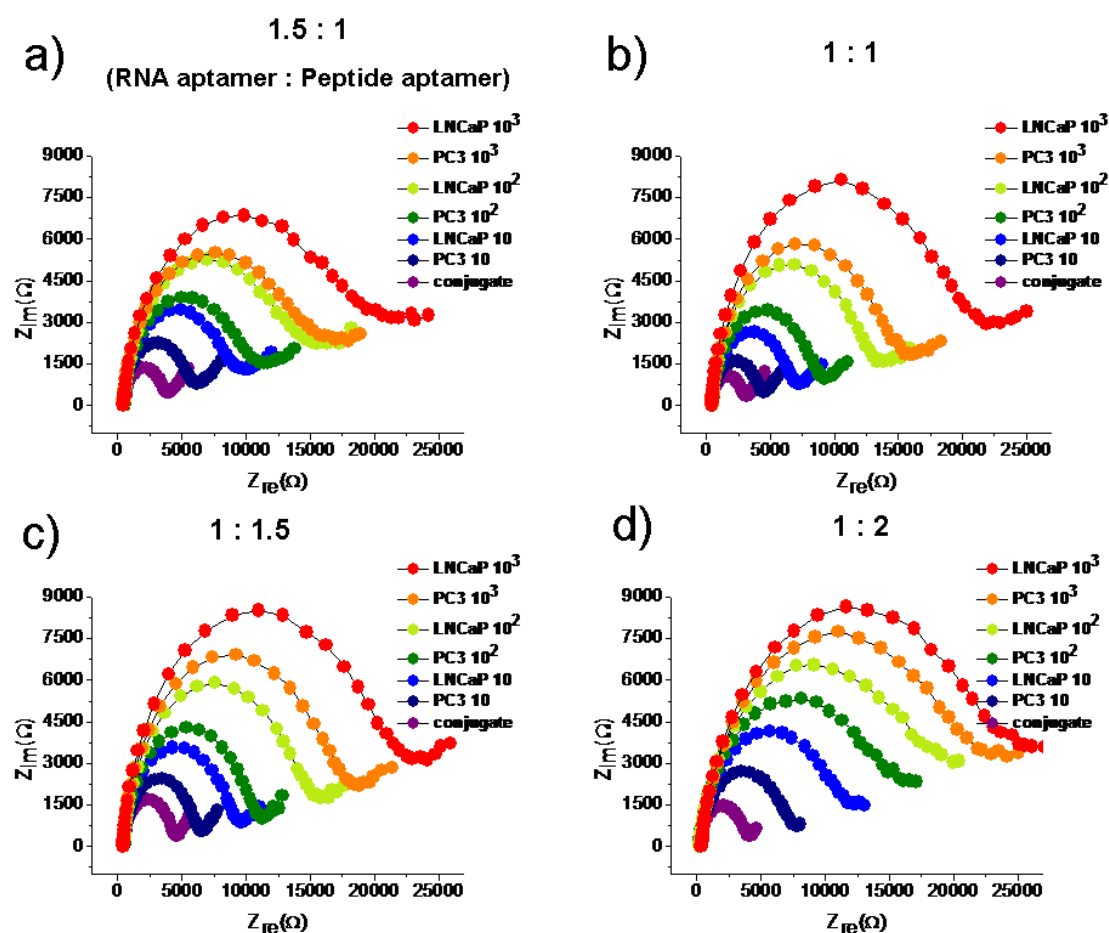

**Figure S2.** Nyquist plots for optimization of EIS detections derived from various ratios

of the A10 RNA aptamers versus DUP-1 peptide aptamers; (a) 1.5 : 1 (15  $\mu\text{M}$  : 10  $\mu\text{M}$ ), (b) 1 : 1 (10  $\mu\text{M}$  : 10  $\mu\text{M}$ ), (c) 1 : 1.5 (10  $\mu\text{M}$  : 15  $\mu\text{M}$ ), and (d) 1 : 2 (10  $\mu\text{M}$  : 20  $\mu\text{M}$ ). Each prostate cancer cell was incubated in RPMI1640-mod media for 30 min with gentle shaking, and BSA (0.2 mg/mL) was treated for 30 min. Detections were carried out in a PBS (pH 7.4) with 5 mM  $[\text{Fe}(\text{CN})_6]^{3-/4-}$ . Detection efficiency of the dual-aptamer probe for prostate cancer cells can be analyzed by intervals of  $R_{\text{ct}}$  values on the Nyquist plots. When the A10 aptamer was more supplemented than the DUP-1 to streptavidin modified electrode for the probe (1.5:1), intervals of  $R_{\text{ct}}$  values were gradually declined as the sequential increase of PC3 (a). However, double amount of the DUP-1 aptamer to the A10 aptamer provides the steady increases of  $R_{\text{ct}}$  values on the plots, and the ratio of 1:2 was then found for impartial detections for both types of prostate cancer cells (d). More than 1:2 ratio makes difficulties of binding of LNCaP cells to the probe (data not shown).

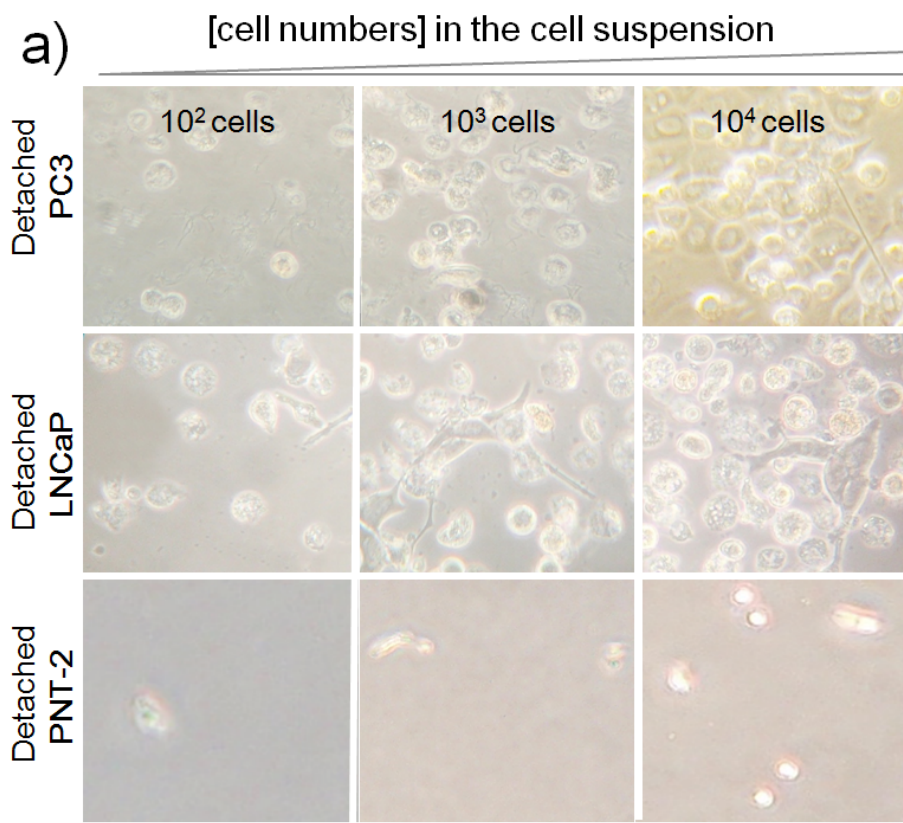

b)

| Cells | [cell numbers] in suspension |              |              |
|-------|------------------------------|--------------|--------------|
|       | $10^2$                       | $10^3$       | $10^4$       |
| PC3   | $23 \pm 4$                   | $112 \pm 15$ | $230 \pm 42$ |
| LNCaP | $19 \pm 2$                   | $124 \pm 23$ | $259 \pm 37$ |
| PNT-2 | $3 \pm 0.8$                  | $7 \pm 2$    | $15 \pm 3$   |

**Figure S3.** Micrographs (a) and counted cell numbers (b) of detached prostate cancer cells (PC3 and LNCaP) and a prostate normal cell (PNT-2) from the aptamer modified Au electrode with increase of cell numbers in the cell suspension.

**Table 1.** The specific detection of prostate cancer cells with co-incubation of PNT2 cells

|       | R <sub>ct</sub> values with 10 <sup>4</sup> PNT2 cells |                       |                       |                       |
|-------|--------------------------------------------------------|-----------------------|-----------------------|-----------------------|
|       | 10 <sup>2</sup> cells                                  | 10 <sup>3</sup> cells | 10 <sup>4</sup> cells | 10 <sup>5</sup> cells |
| LNCaP | 8443.7 ± 890.2                                         | 12990.8 ± 976.9       | 16635.6 ± 1104.5      | 19237.0 ± 1302.5      |
| PC3   | 9004.4 ± 786.3                                         | 12474.4 ± 954.2       | 15734.0 ± 1015.9      | 17464.9 ± 1429.8      |
| PNT2  | 5958.7 ± 660.5                                         | 6375.0 ± 708.1        | 6977.7 ± 799.4        | 7875.3 ± 837.5        |

## References

1. R. Padilla and R. Sousa, *Nucleic Acids Res.*, 1999, **27**, 1561.
2. P. Z. Qin and A. M. Pyle, *Methods*, 1999, **18**, 60.
